# Supplementary material for: Environmental Filtering Influences Functional Community Assembly of Epibenthic Communities
Source: Frontiers journal article supplement (doi:10.3389/fmars.2021.736917), 2021-11-10
Supplement: Table_1.docx [file Table_1.docx]

Table S1. Levene's test output comparing the variability in environmental variables between the Chukchi Sea and Beaufort Sea. Significant differences are in bold.

| **Environmental variable** | **F statistic** | **Alpha** |
| --- | --- | --- |
| Gravel | 0.433 | 0.512 |
| **Sand** | 3.978 | **0.049** |
| **Mud** | 5.141 | **0.025** |
| **Depth** | 25.229 | **0.000** |
| **Temperature** | 81.138 | **0.000** |
| Salinity | 0.779 | 0.379 |
| Chlorophyll-a | 0.040 | 0.841 |
| **FDis** | 10.193 | **0.002** |
